# Supplementary material
Source: HighWire-hosted journal article supplement (https://oem.bmj.com/content/77/3/151)
Supplement: inline-supplementary-material-2 [file inline-supplementary-material-2.pdf]

## GBD 2016 Occupational Carcinogens Collaborators

Tim Driscoll<sup>1</sup>, Lesley Rushton<sup>2</sup>, Kyle Steenland<sup>3</sup>, Sally Hutchings<sup>4</sup>, Kurt Straif<sup>5</sup>, Degu Abate<sup>6</sup>, Omar Abdel-Rahman<sup>7,8</sup>, Dilaram Acharya<sup>9,10</sup>, Mohsen Afarideh<sup>11</sup>, Fares Alahdab<sup>12</sup>, Ziyad Al-Aly<sup>13,14</sup>, Mina Anjomshoa<sup>15</sup>, Olatunde Aremu<sup>16</sup>, Al Artaman<sup>17</sup>, Zerihun Ataro<sup>6</sup>, Beatriz Paulina Ayala Quintanilla<sup>18,19</sup>, Alaa Badawi<sup>20,21</sup>, Masoud Behzadifar<sup>22</sup>, Meysam Behzadifar<sup>23</sup>, Mircea Beuran<sup>24,25</sup>, Krittika Bhattacharyya<sup>26,27</sup>, Ali Bijani<sup>28</sup>, Tone Bjørge<sup>29,30</sup>, Zahid A Butt<sup>31,32</sup>, Juan J Carrero<sup>33</sup>, Félix Carvalho<sup>34,35</sup>, Carlos A Castañeda-Orjuela<sup>36,37</sup>, Ester Cerin<sup>38,39</sup>, Pankaj Chaturvedi<sup>40</sup>, Odgerel Chimed-Ochir<sup>41</sup>, Raquel Crider<sup>42</sup>, Christopher Stephen Crowe<sup>43</sup>, Lalit Dandona<sup>44,45</sup>, Rakhi Dandona<sup>44,45</sup>, Anh Kim Dang<sup>46</sup>, Ahmad Daryani<sup>47</sup>, Beruk Berhanu Desalegn<sup>48</sup>, Samath Dhamminda Dharmaratne<sup>45,49</sup>, Shirin Djalalinia<sup>50</sup>, Andem Effiong<sup>51</sup>, Ziad El-Khatib<sup>52</sup>, Alireza Esteghamati<sup>11</sup>, Mohammad Fareed<sup>53</sup>, Eduarda Fernandes<sup>54</sup>, Irina Filip<sup>55,56</sup>, Florian Fischer<sup>57</sup>, Takeshi Fukumoto<sup>58,59</sup>, Silvano Gallus<sup>60</sup>, Teklu Gebrehiwo Gebremichael<sup>61</sup>, Kebede Embaye Gezae<sup>62</sup>, Ayman Grada<sup>63</sup>, Andre Luiz Sena Guimaraes<sup>64</sup>, Rahul Gupta<sup>65,66</sup>, Nima Hafezi-Nejad<sup>67,68</sup>, Arvin Haj-Mirzaian<sup>69,70</sup>, Arya Haj-Mirzaian<sup>67,69</sup>, Randah R Hamadeh<sup>71</sup>, Samer Hamidi<sup>72</sup>, Hadi Hassankhani<sup>73,74</sup>, Simon I. Hay<sup>45,75</sup>, Mohamed I Hegazy<sup>76</sup>, Andualem Henok<sup>77</sup>, Chi Linh Hoang<sup>78</sup>, Michael K. Hole<sup>79</sup>, H Dean Hosgood<sup>80</sup>, Mostafa Hosseini<sup>81</sup>, Mihaela Hostiuc<sup>25,82</sup>, Sorin Hostiuc<sup>83,84</sup>, Seyed Sina Naghibi Irvani<sup>85,86</sup>, Sheikh Mohammed Shariful Islam<sup>87,88</sup>, Mihajlo Jakovljevic<sup>89</sup>, Ravi Prakash Jha<sup>90</sup>, Mikk Jürisson<sup>91</sup>, Amaha Kahsay<sup>92</sup>, Narges Karimi<sup>93,94</sup>, Amir Kasaeian<sup>95,96</sup>, Zemenu Yohannes Kassa<sup>97</sup>, Yousef Saleh Khader<sup>98</sup>, Morteza Abdullatif Khafaie<sup>99</sup>, Ejaz Ahmad Khan<sup>100</sup>, Mohammad Hossein Khosravi<sup>101</sup>, Jagdish Khubchandani<sup>102</sup>, Aliasghar A Kiadaliri<sup>103</sup>, Yun Jin Kim<sup>104</sup>, Manolis Kogevinas<sup>235</sup>, David Koh<sup>105,106</sup>, Soewarta Kosen<sup>107</sup>, Ai Koyanagi<sup>108,109</sup>, G Anil Kumar<sup>44</sup>, Deepesh P Lad<sup>110</sup>, Dharmesh Kumar Lal<sup>44</sup>, Faris Hasan Lami<sup>111</sup>, Arman Latifi<sup>112</sup>, James Leigh<sup>113</sup>, Shai Linn<sup>114</sup>, Marek Majdan<sup>115</sup>, Reza Malekzadeh<sup>116,117</sup>, Deborah Carvalho Malta<sup>118</sup>, Mohammad Ali Mansournia<sup>81</sup>, Benjamin Ballard Massenbourg<sup>43</sup>, Addisu Melese<sup>119</sup>, Mulugeta Melku<sup>120</sup>, Ziad A Memish<sup>121,122</sup>, Walter Mendoza<sup>123</sup>, Getnet Mengistu<sup>124,125</sup>, Tuomo J Meretoja<sup>126</sup>, Tomislav Mestrovic<sup>127,128</sup>, Bartosz Miazgowski<sup>129</sup>, Tomasz Miazgowski<sup>130</sup>, Erkin M Mirrakhimov<sup>131,132</sup>, Babak Moazen<sup>133,134</sup>, Shafiu Mohammed<sup>135,136</sup>, Farnam Mohebi<sup>86,137</sup>, Ali H Mokdad<sup>45,75</sup>, Yoshan Moodley<sup>138</sup>, Mahmood Moosazadeh<sup>139</sup>, Ghobad Moradi<sup>140,141</sup>, Lidia Morawska<sup>142</sup>, Shane Douglas Morrison<sup>143</sup>, Seyyed Meysam Mousavi<sup>144</sup>, Ghulam Mustafa<sup>145,146</sup>, Ionut Nego<sup>24,147</sup>, Ruxandra Irina Nego<sup>148,149</sup>, Cuong Tat Nguyen<sup>46</sup>, Trang Huyen Nguyen<sup>78</sup>, Dina Nur Anggraini Ningrum<sup>150,151</sup>, Molly R Nixon<sup>45</sup>, Richard Ofori-Asenso<sup>152,153</sup>, Felix Akpojene Ogbo<sup>154</sup>, Andrew T Olagunju<sup>155,156</sup>, Bolajoko Olubukunola Olusanya<sup>157</sup>, Doris D V Ortega-Altamirano<sup>158</sup>, Mahesh P A<sup>159</sup>, Eun-Kee Park<sup>160</sup>, David M. Pereira<sup>54,161</sup>, Swayam Prakash<sup>162</sup>, Mostafa Qorbani<sup>163</sup>, Amir Radfar<sup>164,165</sup>, Anwar Rafay<sup>166,167</sup>, Alireza Rafiei<sup>168,169</sup>, Fakher Rahim<sup>170,171</sup>, Vafa Rahimi-Movaghar<sup>172</sup>, Fatemeh Rajati<sup>173</sup>, Robert C Reiner<sup>45,75</sup>, Andre M. N. Renzaho<sup>174</sup>, Satar Rezaei<sup>175</sup>, Leonardo Roever<sup>176</sup>, Mohammad Saadat<sup>177</sup>, Basema Saddik<sup>178</sup>, Saeed Safari<sup>179</sup>, Saeid Safiri<sup>180</sup>, Amirhossein Sahebkar<sup>181,182</sup>, Mohammad Ali Sahraian<sup>183</sup>, Hamideh Salimzadeh<sup>116</sup>, Abdallah M. Samy<sup>184</sup>, Juan Sanabria<sup>185,186</sup>, Rodrigo Sarmiento-Suárez<sup>187</sup>, Brijesh Sathian<sup>188,189</sup>, David C. Schwebel<sup>190</sup>, Sadaf G. Sepanlou<sup>116</sup>, Berrin Serdar<sup>191,192</sup>, Masood Ali Shaikh<sup>193</sup>, Rajesh Sharma<sup>194</sup>, Jun She<sup>195</sup>, Mika Shigematsu<sup>196</sup>, Reza Shirkoohi<sup>197,198</sup>, Si Si<sup>199</sup>, Dhirendra Narain Sinha<sup>200</sup>, Moslem Soofi<sup>201</sup>, Jeffrey D Stanaway<sup>45,75</sup>, Mark A Stokes<sup>202</sup>, Rafael Tabarés-Seisdedos<sup>203,204</sup>, Takahiro Tabuchi<sup>205</sup>, Ken Takahashi<sup>113,206</sup>, Yonatal Mesfin Tefera<sup>207,208</sup>, Mohamad-Hani Tamsah<sup>122,209</sup>, Marcos Roberto Tovani-Palone<sup>210</sup>, Bach Xuan Tran<sup>211</sup>, Khanh Bao Tran<sup>212,213</sup>, Irfan Ullah<sup>214,215</sup>, Pascual R Valdez<sup>216,217</sup>, Tommi Juhani Vasankari<sup>218</sup>, Francesco S Violante<sup>219,220</sup>, Vasily Vlassov<sup>221</sup>, Giang Thu Vu<sup>78</sup>, Yasir Waheed<sup>222</sup>, Yuan-Pang Wang<sup>223</sup>, Alex Yeshaneh<sup>224</sup>, Biruck Desalegn

Yirsaw<sup>225</sup>, Engida Yisma<sup>226</sup>, Naohiro Yonemoto<sup>227</sup>, Mahmoud Yousefifard<sup>228</sup>, Chuanhua Yu<sup>229,230</sup>, Vesna Zadnik<sup>231</sup>, Mohammad Zamani<sup>232</sup>, Hamed Zandian<sup>233</sup>, Sanjay Zodpey<sup>234</sup>, and Stephen S Lim<sup>45,75</sup>.

## Affiliations

- 1 Sydney School of Public Health, University of Sydney, Sydney, NSW, Australia. .
- 2 Department of Epidemiology and Biostatistics, Imperial College London, London, UK. .
- 3 Rollins School of Public Health, Emory University, Atlanta, GA, USA. .
- 4 School of Health Sciences, University of Manchester, Manchester, UK. .
- 5 Section of Evidence Synthesis and Classification, International Agency for Research on Cancer, Lyon, France. .
- 6 Department of Medical Laboratory Science, Haramaya University, Harar, Ethiopia. .
- 7 Department of Oncology, University of Calgary, Calgary, AB, Canada. .
- 8 Department of Oncology, Ain Shams University, Cairo, Egypt,. .
- 9 Department of Preventive Medicine, Dongguk University, Gyeongju, South Korea. .
- 10 Department of Community Medicine, Kathmandu University, Devdaha, Nepal,. .
- 11 Endocrinology and Metabolism Research Center, Tehran University of Medical Sciences, Tehran, Iran. .
- 12 Evidence Based Practice Center, Mayo Clinic Foundation for Medical Education and Research, Rochester, MN, USA. .
- 13 Internal Medicine Department, Washington University in St. Louis, St Louis, MO, USA. .
- 14 Clinical Epidemiology Center, VA Saint Louis Health Care System, Department of Veterans Affairs, St Louis, MO, United States,. .
- 15 Social Determinants of Health Research Center, Rafsanjan University of Medical Sciences, Rafsanjan, Iran. .
- 16 School of Health Sciences, Birmingham City University, Birmingham, UK. .
- 17 Department of Community Health Sciences, University of Manitoba, Winnipeg, MB, Canada. .
- 18 The Judith Lumley Centre, La Trobe University, Melbourne, VIC, Australia. .
- 19 General Office for Research and Technological Transfer, Peruvian National Institute of Health, Lima, Peru,. .
- 20 Public Health Risk Sciences Division, Public Health Agency of Canada, Toronto, ON, Canada. .
- 21 Department of Nutritional Sciences, University of Toronto, Toronto, ON, Canada,. .

- 22 Social Determinants of Health Research Center, Lorestan University of Medical Sciences, Khorramabad, Iran. .
- 23 Hepatitis Research Center, Lorestan University of Medical Sciences, Khorramabad, Iran. .
- 24 Emergency Hospital of Bucharest, Carol Davila University of Medicine and Pharmacy, Bucharest, Romania. .
- 25 Department of General Surgery, Carol Davila University of Medicine and Pharmacy, Bucharest, Romania. .
- 26 Department of Statistical and Computational Genomics, National Institute of Biomedical Genomics, Kalyani, India. .
- 27 Department of Statistics, University of Calcutta, West Bengal, India. .
- 28 Social Determinants of Health Research Center, Babol University of Medical Sciences, Babol, Iran. .
- 29 Department of Global Public Health and Primary Care, University of Bergen, Bergen, Norway. .
- 30 Cancer Registry of Norway, Oslo, Norway,. .
- 31 School of Population and Public Health, University of British Columbia, Vancouver, BC, Canada. .
- 32 Al Shifa School of Public Health, Al Shifa Trust Eye Hospital, Rawalpindi, Pakistan,. .
- 33 Department of Medical Epidemiology and Biostatistics, Karolinska Institutet, Stockholm, Sweden. .
- 34 Applied Molecular Biosciences Unit, University of Porto, Porto, Portugal. .
- 35 Institute of Public Health, University of Porto, Porto, Portugal,. .
- 36 Colombian National Health Observatory, National Institute of Health, Bogota, Colombia. .
- 37 Epidemiology and Public Health Evaluation Group, National University of Colombia, Bogota, Colombia,. .
- 38 Mary MacKillop Institute for Health Research, Australian Catholic University, Melbourne, VIC, Australia. .
- 39 School of Public Health, University of Hong Kong, Hong Kong, China,. .
- 40 Department of Surgical Oncology, Tata Memorial Hospital, Mumbai, India. .
- 41 Institute of Industrial Ecological Science, University of Occupational and Environmental Health, Kitakyushu, Japan. .
- 42 Board of Directors, Food Ingredient and Health Research Institute, Naalehu, HI, USA. .

- 43 Division of Plastic and Reconstructive Surgery, University of Washington, Seattle, WA, USA. .
- 44 Public Health Foundation of India, Gurugram, India. .
- 45 Institute for Health Metrics and Evaluation, University of Washington, Seattle, WA, USA. .
- 46 Institute for Global Health Innovations, Duy Tan University, Hanoi, Vietnam. .
- 47 Toxoplasmosis Research Center, Mazandaran University of Medical Sciences, Sari, Iran. .
- 48 School of Nutrition, Food Science and Technology, Hawassa University, Hawassa, Ethiopia. .
- 49 Department of Community Medicine, University of Peradeniya, Peradeniya, Sri Lanka. .
- 50 Deputy of Research and Technology, Ministry of Health and Medical Education, Tehran, Iran.  
.
- 51 Department of Clinical Epidemiology and Biostatistics, University of Newcastle, Newcastle, NSW, Australia. .
- 52 Department of Public Health Sciences, Karolinska Institutet, Stockholm, Sweden. .
- 53 College of Medicine, Imam Muhammad Ibn Saud Islamic University, Riyadh, Saudi Arabia. .
- 54 REQUIMTE/LAQV, University of Porto, Porto, Portugal. .
- 55 Department of Psychiatry, Kaiser Permanente, Fontana, CA, USA. .
- 56 Department of Health Sciences, A.T. Still University, Mesa, AZ, United States,. .
- 57 Department of Public Health Medicine, Bielefeld University, Bielefeld, Germany. .
- 58 Gene Expression & Regulation Program, Cancer Institute (W.I.A), Philadelphia, PA, USA. .
- 59 Department of Dermatology, Kobe University, Kobe, Japan,. .
- 60 Department of Environmental Health Science, Mario Negri Institute for Pharmacological Research, Milan, Italy. .
- 61 School of Pharmacy, Mekelle University, Mekelle, Ethiopia. .
- 62 Department of Biostatistics, Mekelle University, Mekelle, Ethiopia. .
- 63 School of Medicine, Boston University, Boston, MA, USA. .
- 64 School of Dentistry, State University of Montes Claros, Montes Claros, Brazil. .
- 65 March of Dimes, Arlington, VA, USA. .
- 66 School of Public Health, West Virginia University, Morgantown, WV, USA. .
- 67 Department of Radiology, Johns Hopkins University, Baltimore, MD, USA. .
- 68 School of Medicine, Tehran University of Medical Sciences, Tehran, Iran,. .

- 69 Department of Pharmacology, Tehran University of Medical Sciences, Tehran, Iran. .
- 70 Obesity Research Center, Research Institute for Endocrine Sciences, Shahid Beheshti University of Medical Sciences, Tehran, Iran. .
- 71 Department of Family and Community Medicine, Arabian Gulf University, Manama, Bahrain.  
.
- 72 School of Health and Environmental Studies, Hamdan Bin Mohammed Smart University, Dubai, United Arab Emirates. .
- 73 School of Nursing and Midwifery, Tabriz University of Medical Sciences, Tabriz, Iran. .
- 74 Independent Consultant, Tabriz, Iran. .
- 75 Department of Health Metrics Sciences, School of Medicine, University of Washington, Seattle, WA, USA. .
- 76 Department of Neurology, Cairo University, Cairo, Egypt. .
- 77 Department of Public Health, Mizan-Tepi University, Teppi, Ethiopia. .
- 78 Center of Excellence in Behavioral Medicine, Nguyen Tat Thanh University, Ho Chi Minh, Vietnam. .
- 79 Department of Pediatrics, Dell Medical School, University of Texas Austin, Austin, TX, USA. .
- 80 Department of Epidemiology and Population Health, Albert Einstein College of Medicine, Bronx, NY, USA. .
- 81 Department of Epidemiology and Biostatistics, Tehran University of Medical Sciences, Tehran, Iran. .
- 82 Department of Internal Medicine, Bucharest Emergency Hospital, Bucharest, Romania,. .
- 83 Department of Legal Medicine and Bioethics, Carol Davila University of Medicine and Pharmacy, Bucharest, Romania. .
- 84 Department of Clinical Legal Medicine, National Institute of Legal Medicine Mina Minovici, Bucharest, Romania,. .
- 85 Research Institute for Endocrine Sciences, Shahid Beheshti University of Medical Sciences, Tehran, Iran. .
- 86 Non-communicable Diseases Research Center, Tehran University of Medical Sciences, Tehran, Iran. .
- 87 Institute for Physical Activity and Nutrition, Deakin University, Burwood, VIC, Australia. .
- 88 Sydney Medical School, University of Sydney, Sydney, NSW, Australia. .

- 89 N.A. Semashko Department of Public Health and Healthcare, I.M. Sechenov First Moscow State Medical University (Sechenov University), Moscow, Russia.
- 90 Department of Community Medicine, Banaras Hindu University, Varanasi, India. .
- 91 Institute of Family Medicine and Public Health, University of Tartu, Tartu, Estonia. .
- 92 Department of Nutrition and Dietetics, Mekelle University, Mekelle, Ethiopia. .
- 93 Immunogenetics Research Center, Mazandaran University of Medical Sciences, Sari, Iran. .
- 94 Department of Neurology, Mazandaran University of Medical Sciences, Sari, Iran. .
- 95 Hematology-Oncology and Stem Cell Transplantation Research Center, Tehran University of Medical Sciences, Tehran, Iran. .
- 96 Hematologic Malignancies Research Center, Tehran University of Medical Sciences, Tehran, Iran. .
- 97 School of Nursing and Midwifery, Hawassa University, Hawassa, Ethiopia. .
- 98 Department of Public Health and Community Medicine, Jordan University of Science and Technology, Ramtha, Jordan. .
- 99 Social Determinants of Health Research Center, Ahvaz Jundishapur University of Medical Sciences, Ahvaz, Iran. .
- 100 Epidemiology and Biostatistics Department, Health Services Academy, Islamabad, Pakistan. .
- 101 International Otorhinolaryngology Research Association (IORA), Universal Scientific Education and Research Network (USERN), Tehran, Iran. .
- 102 Department of Nutrition and Health Science, Ball State University, Muncie, IN, USA. .
- 103 Clinical Epidemiology Unit, Lund University, Lund, Sweden. .
- 104 School of Medicine, Xiamen University Malaysia, Sepang, Malaysia. .
- 105 Pengiran Anak Puteri Rashidah Sa'adatul Bolkia Institute of Health Sciences , Universiti Brunei Darussalam, Bandar Seri Begawan, Brunei. .
- 106 Saw Swee Hock School Of Public Health , National University of Singapore, Singapore. .
- 107 Independent Consultant, Jakarta, Indonesia. .
- 108 CIBERSAM, San Juan de Dios Sanitary Park, Barcelona, Spain. .
- 109 Catalan Institution for Research and Advanced Studies (ICREA), Barcelona, Spain,. .
- 110 Department of Internal Medicine, Post Graduate Institute of Medical Education and Research, Chandigarh, India. .

- 111 Department of Community and Family Medicine, Academy of Medical Science, Baghdad, Iraq. .
- 112 Department of Public Health, Maragheh University of Medical Sciences, Maragheh, Iran. .
- 113 Asbestos Diseases Research Institute, University of Sydney, Sydney, NSW, Australia. .
- 114 School of Public Health, University of Haifa, Haifa, Israel. .
- 115 Department of Public Health, Trnava University, Trnava, Slovakia. .
- 116 Digestive Diseases Research Institute, Tehran University of Medical Sciences, Tehran, Iran. .
- 117 Non-communicable Diseases Research Center, Shiraz University of Medical Sciences, Shiraz, Iran,. .
- 118 Department of Maternal and Child Nursing and Public Health, Universidade Federal de Minas Gerais, Belo Horizonte, Brazil. .
- 119 Department of Medical Laboratory Science, Bahir Dar University, Bahir Dar, Ethiopia. .
- 120 Institute of Public Health, University of Gondar, Ethiopia. .
- 121 Research Department, Prince Mohammed Bin Abdulaziz Hospital, Ministry of Health, Riyadh, Saudi Arabia. .
- 122 College of Medicine, Alfaisal University, Riyadh, Saudi Arabia,. .
- 123 Peru Country Office, United Nations Population Fund (UNFPA), Lima, Peru. .
- 124 School of Pharmacy, Haramaya University, Harar, Ethiopia. .
- 125 Department of Pharmacy, Wollo University, Dessie, Ethiopia. .
- 126 Breast Surgery Unit, Helsinki University Hospital, Helsinki, Finland. .
- 127 Clinical Microbiology and Parasitology Unit, Dr. Zora Profozic Polyclinic, Zagreb, Croatia. .
- 128 University Centre Varazdin, University North, Varazdin, Croatia. .
- 129 Center for Innovation in Medical Education, Pomeranian Medical University, Szczecin, Poland. .
- 130 Department of Hypertension, Pomeranian Medical University, Szczecin, Poland. .
- 131 Faculty of General Medicine, Kyrgyz State Medical Academy, Bishkek, Kyrgyzstan. .
- 132 Department of Atherosclerosis and Coronary Heart Disease, National Center of Cardiology and Internal Disease, Bishkek, Kyrgyzstan. .
- 133 Institute of Public Health, Heidelberg University, Heidelberg, Germany. .



- 134 Institute of Addiction Research (ISFF), Frankfurt University of Applied Sciences, Frankfurt, Germany. .
- 135 Health Systems and Policy Research Unit, Ahmadu Bello University, Zaria, Nigeria. .
- 136 Heidelberg Institute of Global Health, Heidelberg University, Heidelberg, Germany,. .
- 137 Iran National Institute of Health Research, Tehran University of Medical Sciences, Tehran, Iran. .
- 138 Department of Public Health Medicine, University of KwaZulu-Natal, Durban, South Africa. .
- 139 Health Sciences Research Center, Mazandaran University of Medical Sciences, Sari, Iran. .
- 140 Social Determinants of Health Research Center, Kurdistan University of Medical Sciences, Sanandaj, Iran. .
- 141 Department of Epidemiology and Biostatistics, Kurdistan University of Medical Sciences, Sanandaj, Iran,. .
- 142 International Laboratory for Air Quality and Health, Queensland University of Technology, Brisbane, QLD, Australia. .
- 143 Department of Surgery, University of Washington, Seattle, WA, USA. .
- 144 Department of Health Management and Economics, Tehran University of Medical Sciences, Tehran, Iran. .
- 145 Department of Pediatric Medicine, Nishtar Medical University, Multan, Pakistan. .
- 146 Department of Pediatrics, Institute of Mother & Child Care, Multan, Pakistan,. .
- 147 General Surgery Department, Carol Davila University of Medicine and Pharmacy, Bucharest, Romania. .
- 148 Anatomy and Embryology Department, Carol Davila University of Medicine and Pharmacy, Bucharest, Romania. .
- 149 Department of Cardiology, Cardio-Aid, Bucharest, Romania,. .
- 150 Public Health Science Department, State University of Semarang, Kota Semarang, Indonesia. .
- 151 Graduate Institute of Biomedical Informatics, Taipei Medical University, Taipei City, Taiwan,. .
- 152 Centre of Cardiovascular Research and Education in Therapeutics, Monash University, Melbourne, VIC, Australia. .
- 153 Independent Consultant, Accra, Ghana. .

- 154 Translational Health Research Institute, Western Sydney University, Penrith, NSW, Australia.  
.
- 155 Department of Psychiatry and Behavioural Neurosciences, McMaster University, Hamilton, ON, Canada. .
- 156 Department of Psychiatry, University of Lagos, Lagos, Nigeria,. .
- 157 Centre for Healthy Start Initiative, Lagos, Nigeria. .
- 158 Center for Health Systems Research, National Institute of Public Health, Cuernavaca, Mexico.  
.
- 159 Department of TB & Respiratory Medicine, Jagadguru Sri Shivarathreeswara University, Mysore, India. .
- 160 Department of Medical Humanities and Social Medicine, Kosin University, Busan, South Korea. .
- 161 Cartagena University, Cartagena, Colombia. .
- 162 Department of Nephrology, Sanjay Gandhi Postgraduate Institute of Medical Sciences, Lucknow, India. .
- 163 Non-communicable Diseases Research Center, Alborz University of Medical Sciences, Karaj, Iran. .
- 164 A.T. Still University, Mesa, AZ, USA. .
- 165 MEDICHEM, Barcelona, Spain. .
- 166 Department of Epidemiology and Biostatistics, Contech School of Public Health, Lahore, Pakistan. .
- 167 Contech International Health Consultants, Lahore, Pakistan. .
- 168 Department of Immunology, Mazandaran University of Medical Sciences, Sari, Iran. .
- 169 Molecular and Cell Biology Research Center, Mazandaran University of Medical Sciences, Sari, Iran. .
- 170 Thalassemia and Hemoglobinopathy Research Center, Ahvaz Jundishapur University of Medical Sciences, Ahvaz, Iran. .
- 171 Clinical Research Development Unit, Golestan Hospital, Ahvaz Jundishapur University of Medical Sciences, Ahvaz, Iran. .
- 172 Sina Trauma and Surgery Research Center, Tehran University of Medical Sciences, Tehran, Iran. .
- 173 Department of Health Education and Promotion, Kermanshah University of Medical Sciences, Kermanshah, Iran. .

- 174 School of Social Sciences and Psychology, Western Sydney University, Penrith, NSW, Australia. .
- 175 Environmental Determinants of Health Research Center, Kermanshah University of Medical Sciences, Kermanshah, Iran. .
- 176 Department of Clinical Research, Federal University of Uberlândia, Uberlândia, Brazil. .
- 177 Department of Cardiology, Tehran University of Medical Sciences, Tehran, Iran. .
- 178 Medical Department, University of Sharjah, Sharjah, United Arab Emirates. .
- 179 Emergency Department, Shahid Beheshti University of Medical Sciences, Tehran, Iran. .
- 180 Department of Epidemiology and Biostatistics, School of Public Health, Tabriz University of Medical Sciences, Tabriz, Iran. .
- 181 Biotechnology Research Center, Mashhad University of Medical Sciences, Mashhad, Iran. .
- 182 Neurogenic Inflammation Research Center, Mashhad University of Medical Sciences, Mashhad, Iran. .
- 183 Multiple Sclerosis Research Center, Tehran University of Medical Sciences, Tehran, Iran. .
- 184 Department of Entomology, Ain Shams University, Cairo, Egypt. .
- 185 Department of Surgery, Marshall University, Huntington, WV, USA. .
- 186 Department of Nutrition and Preventive Medicine, Case Western Reserve University, Cleveland, OH, USA. .
- 187 Department of Health and Society, Faculty of Medicine, University of Applied and Environmental Sciences, Bogotá, Colombia. .
- 188 Surgery Department, Hamad Medical Corporation, Doha, Qatar. .
- 189 Faculty of Health & Social Sciences, Bournemouth University, Bournemouth, UK. .
- 190 Department of Psychology, University of Alabama at Birmingham, Birmingham, AL, USA. .
- 191 Environmental Health Associates LLC, Englewood, CO, USA. .
- 192 School of Public Health, University of Colorado Denver, Denver, CO, USA. .
- 193 Independent Consultant, Karachi, Pakistan. .
- 194 University School of Management and Entrepreneurship, Delhi Technological University, New Delhi, India. .
- 195 Department of Pulmonary Medicine, Fudan University, Shanghai, China. .
- 196 National Institute of Infectious Diseases, Tokyo, Japan. .

- 197 Cancer Research Institute, Tehran University of Medical Sciences, Tehran, Iran. .
- 198 Cancer Biology Research Center, Tehran University of Medical Sciences, Tehran, Iran. .
- 199 School of Public Health and Preventive Medicine, Monash University, Melbourne, VIC, Australia. .
- 200 Department of Epidemiology, School of Preventive Oncology, Patna, India. .
- 201 Social Development and Health Promotion Research Center, Kermanshah University of Medical Sciences, Kermanshah, Iran. .
- 202 Department of Psychology, Deakin University, Burwood, VIC, Australia. .
- 203 Department of Medicine, University of Valencia, Valencia, Spain. .
- 204 Carlos III Health Institute, Biomedical Research Networking Center for Mental Health Network (CiberSAM), Madrid, Spain,. .
- 205 Cancer Control Center, Osaka International Cancer Institute, Osaka, Japan. .
- 206 University of Sydney, Sydney, NSW, Australia. .
- 207 School of Public Health, University of Adelaide, Adelaide, SA, Australia. .
- 208 Department of Environmental Health, Wollo University, Dessie, Ethiopia,. .
- 209 Department of Pediatrics, King Saud University, Riyadh, Saudi Arabia. .
- 210 Department of Pathology and Legal Medicine, University of São Paulo, Ribeirão Preto, Brazil.  
.
- 211 Department of Health Economics, Hanoi Medical University, Hanoi, Vietnam. .
- 212 Department of Molecular Medicine and Pathology, Auckland Cancer Society Research Centre, University of Auckland, Auckland, New Zealand. .
- 213 Maurice Wilkins Centre for Biodiscovery, Auckland, New Zealand. .
- 214 Gomal Center of Biochemistry and Biotechnology, Gomal University, Dera Ismail Khan, Pakistan. .
- 215 TB Culture Laboratory, Mufti Mehmood Memorial Teaching Hospital, Dera Ismail Khan, Pakistan. .
- 216 Argentine Society of Medicine, Buenos Aires, Argentina. .
- 217 Velez Sarsfield Hospital, Buenos Aires, Argentina,. .
- 218 UKK Institute, Tampere, Finland. .
- 219 Department of Medical and Surgical Sciences, University of Bologna, Bologna, Italy. .

- 220 Occupational Health Unit, Sant'Orsola Malpighi Hospital, Bologna, Italy. .
- 221 Department of Health Care Administration and Economy, National Research University Higher School of Economics, Moscow, Russia. .
- 222 Foundation University Medical College, Foundation University, Rawalpindi, Pakistan. .
- 223 Department of Psychiatry, University of São Paulo, São Paulo, Brazil. .
- 224 Department of Midwifery, Wolkite University, Wolkite, Ethiopia. .
- 225 University of South Australia, Adelaide, NSW, Australia. .
- 226 School of Allied Health Sciences, Addis Ababa University, Addis Ababa, Ethiopia. .
- 227 Department of Psychopharmacology, National Center of Neurology and Psychiatry, Tokyo, Japan. .
- 228 Physiology Research Center, Iran University of Medical Sciences, Tehran, Iran. .
- 229 Department of Epidemiology and Biostatistics, Wuhan University, Wuhan, China. .
- 230 Global Health Institute, Wuhan University, Wuhan, China,. .
- 231 Epidemiology and Cancer Registry Sector, Institute of Oncology Ljubljana, Ljubljana, Slovenia. .
- 232 Student Research Committee, Babol University of Medical Sciences, Babol, Iran. .
- 233 Social Determinants of Health Research Center, Ardabil University of Medical Science, Ardabil, Iran. .
- 234 Indian Institute of Public Health, Public Health Foundation of India, Gurugram, India. .
- 235 ISGlobal, Barcelona, Spain
